# Supplementary material for: Boron Effects on Fruit Set, Yield, Quality and Paternity of Hass Avocado
Source: MDPI journal article supplement (doi:10.3390/agronomy12061479), 2022-06-20
Supplement: s1 [file s1]

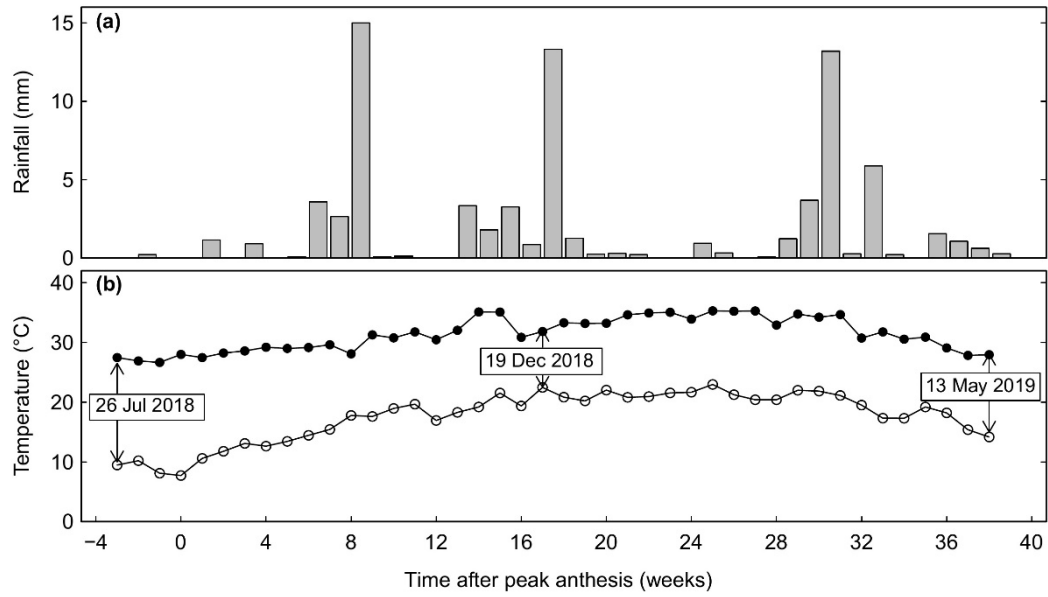

**Figure S1.** Average daily (a) rainfall and (b) maximum (●—●) and minimum (○—○) temperature at Bundaberg (24°53'55" S 152°19'20" E), Australia, for each week of the study period. Arrows show the start, mid and end dates of the study period.

**Table S1.** Mineral nutrient concentrations\* in flowers and leaves at 0, 6, 10 and 28 weeks after peak anthesis of Hass avocado trees treated with 0, 15 or 30 g boron per tree prior to flowering

| Sample and time          | Nutrient       | Boron application (g/tree) |               |                |
|--------------------------|----------------|----------------------------|---------------|----------------|
|                          |                | 0                          | 15            | 30             |
| Flowers at peak anthesis | Nitrogen (N)   | 2.87 ± 0.06 a              | 2.97 ± 0.08 a | 3.01 ± 0.05 a  |
|                          | Phosphorus (P) | 0.35 ± 0.01 a              | 0.36 ± 0.02 a | 0.34 ± 0.01 a  |
|                          | Potassium (K)  | 1.37 ± 0.03 a              | 1.43 ± 0.02 a | 1.41 ± 0.04 a  |
|                          | Aluminium (Al) | 68.3 ± 4.8 a               | 76.6 ± 6.9 a  | 70.2 ± 6.8 a   |
|                          | Calcium (Ca)   | 2969 ± 145 a               | 3153 ± 270 a  | 2903 ± 126 a   |
|                          | Copper (Cu)    | 17.7 ± 0.9 a               | 18.5 ± 1.2 a  | 17.6 ± 0.7 a   |
|                          | Iron (Fe)      | 112 ± 6 a                  | 128 ± 12 a    | 112 ± 8 a      |
|                          | Magnesium (Mg) | 1565 ± 55 a                | 1668 ± 154 a  | 1523 ± 39 a    |
|                          | Manganese (Mn) | 255 ± 23 a                 | 263 ± 17 a    | 256 ± 21 a     |
|                          | Sodium (Na)    | 73.6 ± 8.3 a               | 98.9 ± 15.9 a | 80.7 ± 10.3 a  |
|                          | Sulphur (S)    | 2251 ± 59 a                | 2301 ± 80 a   | 2294 ± 89 a    |
|                          | Zinc (Zn)      | 50.8 ± 0.8 a               | 51.8 ± 4.0 a  | 50.6 ± 2.4 a   |
| Leaves at peak anthesis  | Nitrogen (N)   | 2.51 ± 0.06 a              | 2.51 ± 0.07 a | 2.57 ± 0.08 a  |
|                          | Phosphorus (P) | 0.15 ± 0.01 a              | 0.14 ± 0.00 a | 0.15 ± 0.01 a  |
|                          | Potassium (K)  | 0.84 ± 0.05 a              | 0.76 ± 0.05 a | 0.76 ± 0.03 a  |
|                          | Aluminium (Al) | 134.1 ± 8.5 a              | 131.7 ± 4.9 a | 136.6 ± 10.3 a |
|                          | Calcium (Ca)   | 16034 ± 452 a              | 16612 ± 982 a | 16643 ± 858 a  |
|                          | Copper (Cu)    | 14.2 ± 1.0 a               | 15.3 ± 1.6 a  | 13.7 ± 0.5 a   |
|                          | Iron (Fe)      | 175 ± 13 a                 | 173 ± 13 a    | 161 ± 8 a      |
|                          | Magnesium (Mg) | 4829 ± 201 a               | 4743 ± 231 a  | 4531 ± 91 a    |
|                          | Manganese (Mn) | 1823 ± 152 a               | 1986 ± 79 a   | 1970 ± 124 a   |
|                          | Sodium (Na)    | 96.4 ± 5.7 a               | 92.2 ± 4.3 a  | 97.2 ± 5.9 a   |
|                          | Sulphur (S)    | 2593 ± 180 a               | 2633 ± 120 a  | 2563 ± 139 a   |
|                          | Zinc (Zn)      | 37.0 ± 1.4 ab              | 38.4 ± 1.0 a  | 35.2 ± 1.1 b   |

Table S1. *Cont.*

| Sample and time                        | Nutrient       | Boron application (g/tree) |               |                |
|----------------------------------------|----------------|----------------------------|---------------|----------------|
|                                        |                | 0                          | 15            | 30             |
| Leaves at 6 weeks after peak anthesis  | Nitrogen (N)   | 2.57 ± 0.04 a              | 2.70 ± 0.08 a | 2.69 ± 0.06 a  |
|                                        | Phosphorus (P) | 0.23 ± 0.01 a              | 0.24 ± 0.01 a | 0.24 ± 0.01 a  |
|                                        | Potassium (K)  | 1.31 ± 0.04 a              | 1.34 ± 0.05 a | 1.29 ± 0.05 a  |
|                                        | Aluminium (Al) | 31.5 ± 3.1 a               | 29.5 ± 1.7 a  | 26.2 ± 1.5 b   |
|                                        | Calcium (Ca)   | 8211 ± 688 a               | 7046 ± 490 ab | 6861 ± 387 b   |
|                                        | Copper (Cu)    | 12.4 ± 0.6 b               | 12.1 ± 0.5 b  | 13.1 ± 0.3 a   |
|                                        | Iron (Fe)      | 74.7 ± 6.0 b               | 96.8 ± 16.7 a | 95.0 ± 17.2 ab |
|                                        | Magnesium (Mg) | 2467 ± 233 a               | 2232 ± 120 a  | 2274 ± 126 a   |
|                                        | Manganese (Mn) | 670 ± 63 a                 | 653 ± 49 a    | 648 ± 58 a     |
|                                        | Sodium (Na)    | 140 ± 7 b                  | 173 ± 17 a    | 149 ± 12 ab    |
|                                        | Sulphur (S)    | 2560 ± 139 a               | 2678 ± 104 a  | 2496 ± 118 a   |
|                                        | Zinc (Zn)      | 50.8 ± 1.7 a               | 51.1 ± 0.8 a  | 52.9 ± 1.3 a   |
| Leaves at 10 weeks after peak anthesis | Nitrogen (N)   | 2.67 ± 0.05 b              | 2.83 ± 0.09 a | 2.82 ± 0.09 a  |
|                                        | Phosphorus (P) | 0.22 ± 0.01 a              | 0.24 ± 0.01 a | 0.23 ± 0.01    |
|                                        | Potassium (K)  | 1.05 ± 0.08 ab             | 1.11 ± 0.07 a | 0.98 ± 0.05 b  |
|                                        | Aluminium (Al) | 24.3 ± 2.7 a               | 20.4 ± 1.6 a  | 21.0 ± 1.8 a   |
|                                        | Calcium (Ca)   | 6983 ± 649 a               | 5445 ± 668 a  | 6488 ± 783 a   |
|                                        | Copper (Cu)    | 96.5 ± 8.2 a               | 90.3 ± 8.3 a  | 93.1 ± 11.2 a  |
|                                        | Iron (Fe)      | 64.4 ± 5.9 a               | 62.5 ± 4.7 a  | 59.6 ± 3.1 a   |
|                                        | Magnesium (Mg) | 2236 ± 91 a                | 2174 ± 148 a  | 2157 ± 140 a   |
|                                        | Manganese (Mn) | 676 ± 80 a                 | 651 ± 74 a    | 728 ± 95 a     |
|                                        | Sodium (Na)    | 81.3 ± 5.5 a               | 80.0 ± 13.2 a | 76.3 ± 9.3 a   |
|                                        | Sulphur (S)    | 2335 ± 145 a               | 2363 ± 121 a  | 2323 ± 164 a   |
|                                        | Zinc (Zn)      | 34.6 ± 1.3 a               | 36.8 ± 1.7 a  | 37.2 ± 2.5 a   |

Table S1. *Cont.*

| Sample and time                        | Nutrient       | Boron application (g/tree) |               |               |
|----------------------------------------|----------------|----------------------------|---------------|---------------|
|                                        |                | 0                          | 15            | 30            |
| Leaves at 28 weeks after peak anthesis | Nitrogen (N)   | 2.10 ± 0.06 a              | 2.16 ± 0.06 a | 2.02 ± 0.08 a |
|                                        | Phosphorus (P) | 0.20 ± 0.01 a              | 0.21 ± 0.01 a | 0.20 ± 0.01 a |
|                                        | Potassium (K)  | 0.94 ± 0.05 a              | 0.93 ± 0.03 a | 0.97 ± 0.03 a |
|                                        | Aluminium (Al) | 28.8 ± 2.5 a               | 31.9 ± 3.0 a  | 30.2 ± 2.5 a  |
|                                        | Calcium (Ca)   | 7046 ± 562 a               | 6638 ± 547 a  | 7071 ± 577 a  |
|                                        | Copper (Cu)    | 95.8 ± 4.5 a               | 98.7 ± 5.3 a  | 98.0 ± 7.3 a  |
|                                        | Iron (Fe)      | 58.2 ± 2.5 b               | 67.5 ± 3.9 a  | 59.6 ± 3.4 b  |
|                                        | Magnesium (Mg) | 2151 ± 111 a               | 2124 ± 135 a  | 2104 ± 126 a  |
|                                        | Manganese (Mn) | 484 ± 56 a                 | 579 ± 66 a    | 562 ± 58 a    |
|                                        | Sodium (Na)    | 121 ± 16 ab                | 158 ± 27 a    | 109 ± 8 b     |
|                                        | Sulphur (S)    | 1986 ± 105 b               | 2280 ± 112 a  | 2014 ± 179 b  |
|                                        | Zinc (Zn)      | 33.5 ± 1.4 ab              | 35.6 ± 0.7 a  | 32.6 ± 1.5 b  |

\*Nutrient concentrations are expressed in mg/100 g fresh mass except that N, P and K concentrations are expressed as %. Means ± SE within a row with different letters are significantly different (generalised linear models;  $p < 0.05$ ;  $n=10$  trees)
